# Supplementary material for: Risk of Cardiometabolic Disease and All‐Cause Mortality in Female Survivors of Domestic Abuse
Source: PubMed Central journal article supplement — J Am Heart Assoc. 2020 Feb 17;9(4):e014580. doi: 10.1161/JAHA.119.014580 (PMC7070197; doi:10.1161/jaha.119.014580), 2020-02-17
Supplement: JAH3-9-e014580-s001.pdf [file JAH3-9-e014580-s001.pdf]

# SUPPLEMENTAL MATERIAL

Table S1. Read codes for domestic abuse, outcomes, baseline data and co-variates.

### Domestic abuse

| Clinical Code | Description                                  |
|---------------|----------------------------------------------|
| 14X3.00       | History of domestic violence                 |
| 14X8.00       | Victim of domestic violence                  |
| 14XD.00       | History of domestic abuse                    |
| 14XE.00       | History of being victim of domestic violence |
| 14XG.00       | Victim of domestic abuse                     |

### Type 2 Diabetes

| Clinical Code | Description                                                  |
|---------------|--------------------------------------------------------------|
| C10..00       | Diabetes mellitus                                            |
| C100.00       | Diabetes mellitus with no mention of complication            |
| C100100       | Diabetes mellitus, adult onset, no mention of complication   |
| C100111       | Maturity onset diabetes                                      |
| C100112       | Non-insulin dependent diabetes mellitus                      |
| C100z00       | Diabetes mellitus NOS with no mention of complication        |
| C101.00       | Diabetes mellitus with ketoacidosis                          |
| C101100       | Diabetes mellitus, adult onset, with ketoacidosis            |
| C101y00       | Other specified diabetes mellitus with ketoacidosis          |
| C101z00       | Diabetes mellitus NOS with ketoacidosis                      |
| C102.00       | Diabetes mellitus with hyperosmolar coma                     |
| C102100       | Diabetes mellitus, adult onset, with hyperosmolar coma       |
| C102z00       | Diabetes mellitus NOS with hyperosmolar coma                 |
| C103.00       | Diabetes mellitus with ketoacidotic coma                     |
| C103100       | Diabetes mellitus, adult onset, with ketoacidotic coma       |
| C103y00       | Other specified diabetes mellitus with coma                  |
| C103z00       | Diabetes mellitus NOS with ketoacidotic coma                 |
| C104.00       | Diabetes mellitus with renal manifestation                   |
| C104.11       | Diabetic nephropathy                                         |
| C104100       | Diabetes mellitus, adult onset, with renal manifestation     |
| C104y00       | Other specified diabetes mellitus with renal complications   |
| C104z00       | Diabetes mellitus with nephropathy NOS                       |
| C105.00       | Diabetes mellitus with ophthalmic manifestation              |
| C105100       | Diabetes mellitus, adult onset, + ophthalmic manifestation   |
| C105y00       | Other specified diabetes mellitus with ophthalmic complicatn |

|         |                                                               |
|---------|---------------------------------------------------------------|
| C105z00 | Diabetes mellitus NOS with ophthalmic manifestation           |
| C106.00 | Diabetes mellitus with neurological manifestation             |
| C106.11 | Diabetic amyotrophy                                           |
| C106.12 | Diabetes mellitus with neuropathy                             |
| C106.13 | Diabetes mellitus with polyneuropathy                         |
| C106100 | Diabetes mellitus, adult onset, + neurological manifestation  |
| C106y00 | Other specified diabetes mellitus with neurological comps     |
| C106z00 | Diabetes mellitus NOS with neurological manifestation         |
| C107.00 | Diabetes mellitus with peripheral circulatory disorder        |
| C107.11 | Diabetes mellitus with gangrene                               |
| C107.12 | Diabetes with gangrene                                        |
| C107100 | Diabetes mellitus, adult, + peripheral circulatory disorder   |
| C107200 | Diabetes mellitus, adult with gangrene                        |
| C107400 | NIDDM with peripheral circulatory disorder                    |
| C107y00 | Other specified diabetes mellitus with periph circ comps      |
| C107z00 | Diabetes mellitus NOS with peripheral circulatory disorder    |
| C108y00 | Other specified diabetes mellitus with multiple comps         |
| C108z00 | Unspecified diabetes mellitus with multiple complications     |
| C109.00 | Non-insulin dependent diabetes mellitus                       |
| C109.11 | NIDDM - Non-insulin dependent diabetes mellitus               |
| C109.12 | Type 2 diabetes mellitus                                      |
| C109.13 | Type II diabetes mellitus                                     |
| C109000 | Non-insulin-dependent diabetes mellitus with renal comps      |
| C109011 | Type II diabetes mellitus with renal complications            |
| C109012 | Type 2 diabetes mellitus with renal complications             |
| C109100 | Non-insulin-dependent diabetes mellitus with ophthalmic comps |
| C109111 | Type II diabetes mellitus with ophthalmic complications       |
| C109112 | Type 2 diabetes mellitus with ophthalmic complications        |
| C109200 | Non-insulin-dependent diabetes mellitus with neuro comps      |
| C109211 | Type II diabetes mellitus with neurological complications     |
| C109212 | Type 2 diabetes mellitus with neurological complications      |
| C109300 | Non-insulin-dependent diabetes mellitus with multiple comps   |
| C109311 | Type II diabetes mellitus with multiple complications         |
| C109312 | Type 2 diabetes mellitus with multiple complications          |
| C109400 | Non-insulin dependent diabetes mellitus with ulcer            |
| C109411 | Type II diabetes mellitus with ulcer                          |
| C109412 | Type 2 diabetes mellitus with ulcer                           |
| C109500 | Non-insulin dependent diabetes mellitus with gangrene         |
| C109511 | Type II diabetes mellitus with gangrene                       |
| C109512 | Type 2 diabetes mellitus with gangrene                        |
| C109600 | Non-insulin-dependent diabetes mellitus with retinopathy      |

|         |                                                              |
|---------|--------------------------------------------------------------|
| C109611 | Type II diabetes mellitus with retinopathy                   |
| C109612 | Type 2 diabetes mellitus with retinopathy                    |
| C109700 | Non-insulin dependent diabetes mellitus - poor control       |
| C109711 | Type II diabetes mellitus - poor control                     |
| C109712 | Type 2 diabetes mellitus - poor control                      |
| C109800 | Reaven's syndrome                                            |
| C109900 | Non-insulin-dependent diabetes mellitus without complication |
| C109911 | Type II diabetes mellitus without complication               |
| C109912 | Type 2 diabetes mellitus without complication                |
| C109A00 | Non-insulin dependent diabetes mellitus with mononeuropathy  |
| C109A11 | Type II diabetes mellitus with mononeuropathy                |
| C109A12 | Type 2 diabetes mellitus with mononeuropathy                 |
| C109B00 | Non-insulin dependent diabetes mellitus with polyneuropathy  |
| C109B11 | Type II diabetes mellitus with polyneuropathy                |
| C109B12 | Type 2 diabetes mellitus with polyneuropathy                 |
| C109C00 | Non-insulin dependent diabetes mellitus with nephropathy     |
| C109C11 | Type II diabetes mellitus with nephropathy                   |
| C109C12 | Type 2 diabetes mellitus with nephropathy                    |
| C109D00 | Non-insulin dependent diabetes mellitus with hypoglyca coma  |
| C109D11 | Type II diabetes mellitus with hypoglycaemic coma            |
| C109D12 | Type 2 diabetes mellitus with hypoglycaemic coma             |
| C109E00 | Non-insulin depend diabetes mellitus with diabetic cataract  |
| C109E11 | Type II diabetes mellitus with diabetic cataract             |
| C109E12 | Type 2 diabetes mellitus with diabetic cataract              |
| C109F00 | Non-insulin-dependent d m with peripheral angiopath          |
| C109F11 | Type II diabetes mellitus with peripheral angiopathy         |
| C109F12 | Type 2 diabetes mellitus with peripheral angiopathy          |
| C109G00 | Non-insulin dependent diabetes mellitus with arthropathy     |
| C109G11 | Type II diabetes mellitus with arthropathy                   |
| C109G12 | Type 2 diabetes mellitus with arthropathy                    |
| C109H00 | Non-insulin dependent d m with neuropathic arthropathy       |
| C109H11 | Type II diabetes mellitus with neuropathic arthropathy       |
| C109H12 | Type 2 diabetes mellitus with neuropathic arthropathy        |
| C109J00 | Insulin treated Type 2 diabetes mellitus                     |
| C109J11 | Insulin treated non-insulin dependent diabetes mellitus      |
| C109J12 | Insulin treated Type II diabetes mellitus                    |
| C109K00 | Hyperosmolar non-ketotic state in type 2 diabetes mellitus   |
| C10A.00 | Malnutrition-related diabetes mellitus                       |
| C10A.11 | Jamaica type diabetes                                        |

|         |                                                              |
|---------|--------------------------------------------------------------|
| C10A000 | Malnutrition-related diabetes mellitus with coma             |
| C10A100 | Malnutrition-related diabetes mellitus with ketoacidosis     |
| C10A200 | Malnutrition-related diabetes mellitus with renal complicatn |
| C10A300 | Malnutrit-related diabetes mellitus wth ophthalmic complicat |
| C10A400 | Malnutrition-related diabetes mellitus wth neuro complicatns |
| C10A500 | Malnutritn-relat diabetes melitus wth periph circul complctn |
| C10A600 | Malnutrition-related diabetes mellitus with multiple comps   |
| C10A700 | Malnutrition-related diabetes mellitus without complications |
| C10AW00 | Malnutrit-related diabetes mellitus with unspec complics     |
| C10AX00 | Malnutrit-relat diabetes mellitus with other spec comps      |
| C10B.00 | Diabetes mellitus induced by steroids                        |
| C10B000 | Steroid induced diabetes mellitus without complication       |
| C10C.00 | Diabetes mellitus autosomal dominant                         |
| C10C.11 | Maturity onset diabetes in youth                             |
| C10D.00 | Diabetes mellitus autosomal dominant type 2                  |
| C10D.11 | Maturity onset diabetes in youth type 2                      |
| C10ER00 | Latent autoimmune diabetes mellitus in adult                 |
| C10F.00 | Type 2 diabetes mellitus                                     |
| C10F.11 | Type II diabetes mellitus                                    |
| C10F000 | Type 2 diabetes mellitus with renal complications            |
| C10F011 | Type II diabetes mellitus with renal complications           |
| C10F100 | Type 2 diabetes mellitus with ophthalmic complications       |
| C10F111 | Type II diabetes mellitus with ophthalmic complications      |
| C10F200 | Type 2 diabetes mellitus with neurological complications     |
| C10F211 | Type II diabetes mellitus with neurological complications    |
| C10F300 | Type 2 diabetes mellitus with multiple complications         |
| C10F311 | Type II diabetes mellitus with multiple complications        |
| C10F400 | Type 2 diabetes mellitus with ulcer                          |
| C10F411 | Type II diabetes mellitus with ulcer                         |
| C10F500 | Type 2 diabetes mellitus with gangrene                       |
| C10F511 | Type II diabetes mellitus with gangrene                      |
| C10F600 | Type 2 diabetes mellitus with retinopathy                    |
| C10F611 | Type II diabetes mellitus with retinopathy                   |
| C10F700 | Type 2 diabetes mellitus - poor control                      |
| C10F711 | Type II diabetes mellitus - poor control                     |
| C10F800 | Reaven's syndrome                                            |
| C10F811 | Metabolic syndrome X                                         |
| C10F900 | Type 2 diabetes mellitus without complication                |
| C10F911 | Type II diabetes mellitus without complication               |
| C10FA00 | Type 2 diabetes mellitus with mononeuropathy                 |
| C10FA11 | Type II diabetes mellitus with mononeuropathy                |
| C10FB00 | Type 2 diabetes mellitus with polyneuropathy                 |

|         |                                                             |
|---------|-------------------------------------------------------------|
| C10FB11 | Type II diabetes mellitus with polyneuropathy               |
| C10FC00 | Type 2 diabetes mellitus with nephropathy                   |
| C10FC11 | Type II diabetes mellitus with nephropathy                  |
| C10FD00 | Type 2 diabetes mellitus with hypoglycaemic coma            |
| C10FD11 | Type II diabetes mellitus with hypoglycaemic coma           |
| C10FE00 | Type 2 diabetes mellitus with diabetic cataract             |
| C10FE11 | Type II diabetes mellitus with diabetic cataract            |
| C10FF00 | Type 2 diabetes mellitus with peripheral angiopathy         |
| C10FF11 | Type II diabetes mellitus with peripheral angiopathy        |
| C10FG00 | Type 2 diabetes mellitus with arthropathy                   |
| C10FG11 | Type II diabetes mellitus with arthropathy                  |
| C10FH00 | Type 2 diabetes mellitus with neuropathic arthropathy       |
| C10FH11 | Type II diabetes mellitus with neuropathic arthropathy      |
| C10FJ00 | Insulin treated Type 2 diabetes mellitus                    |
| C10FJ11 | Insulin treated Type II diabetes mellitus                   |
| C10FK00 | Hyperosmolar non-ketotic state in type 2 diabetes mellitus  |
| C10FK11 | Hyperosmolar non-ketotic state in type II diabetes mellitus |
| C10FL00 | Type 2 diabetes mellitus with persistent proteinuria        |
| C10FL11 | Type II diabetes mellitus with persistent proteinuria       |
| C10FM00 | Type 2 diabetes mellitus with persistent microalbuminuria   |
| C10FM11 | Type II diabetes mellitus with persistent microalbuminuria  |
| C10FN00 | Type 2 diabetes mellitus with ketoacidosis                  |
| C10FN11 | Type II diabetes mellitus with ketoacidosis                 |
| C10FP00 | Type 2 diabetes mellitus with ketoacidotic coma             |
| C10FP11 | Type II diabetes mellitus with ketoacidotic coma            |
| C10FQ00 | Type 2 diabetes mellitus with exudative maculopathy         |
| C10FQ11 | Type II diabetes mellitus with exudative maculopathy        |
| C10FR00 | Type 2 diabetes mellitus with gastroparesis                 |
| C10FR11 | Type II diabetes mellitus with gastroparesis                |
| C10FS00 | Maternally inherited diabetes mellitus                      |
| C10G.00 | Secondary pancreatic diabetes mellitus                      |
| C10G000 | Secondary pancreatic diabetes mellitus without complication |
| C10H.00 | Diabetes mellitus induced by non-steroid drugs              |
| C10H000 | DM induced by non-steroid drugs without complication        |
| C10J.00 | Insulin autoimmune syndrome                                 |
| C10J000 | Insulin autoimmune syndrome without complication            |
| C10K.00 | Type A insulin resistance                                   |
| C10K000 | Type A insulin resistance without complication              |
| C10L.00 | Fibrocalculous pancreatopathy                               |
| C10L000 | Fibrocalculous pancreatopathy without complication          |
| C10M.00 | Lipoatrophic diabetes mellitus                              |
| C10M000 | Lipoatrophic diabetes mellitus without complication         |

|         |                                                            |
|---------|------------------------------------------------------------|
| C10N.00 | Secondary diabetes mellitus                                |
| C10N000 | Secondary diabetes mellitus without complication           |
| C10N100 | Cystic fibrosis related diabetes mellitus                  |
| C10P.00 | Diabetes mellitus in remission                             |
| C10P100 | Type II diabetes mellitus in remission                     |
| C10P111 | Type 2 diabetes mellitus in remission                      |
| C10y.00 | Diabetes mellitus with other specified manifestation       |
| C10y100 | Diabetes mellitus, adult, + other specified manifestation  |
| C10yy00 | Other specified diabetes mellitus with other spec comps    |
| C10yz00 | Diabetes mellitus NOS with other specified manifestation   |
| C10z.00 | Diabetes mellitus with unspecified complication            |
| C10z100 | Diabetes mellitus, adult onset, + unspecified complication |
| C10zy00 | Other specified diabetes mellitus with unspecified comps   |
| C10zz00 | Diabetes mellitus NOS with unspecified complication        |

### Ischaemic Heart Disease

| Clinical Code | Description                                          |
|---------------|------------------------------------------------------|
| G3...00       | Ischaemic heart disease                              |
| G3...11       | Arteriosclerotic heart disease                       |
| G3...12       | Atherosclerotic heart disease                        |
| G3...13       | IHD - Ischaemic heart disease                        |
| G30..00       | Acute myocardial infarction                          |
| G30..11       | Attack - heart                                       |
| G30..12       | Coronary thrombosis                                  |
| G30..13       | Cardiac rupture following myocardial infarction (MI) |
| G30..14       | Heart attack                                         |
| G30..15       | MI - acute myocardial infarction                     |
| G30..16       | Thrombosis - coronary                                |
| G30..17       | Silent myocardial infarction                         |
| G300.00       | Acute anterolateral infarction                       |
| G301.00       | Other specified anterior myocardial infarction       |
| G301000       | Acute anteroapical infarction                        |
| G301100       | Acute anteroseptal infarction                        |
| G301z00       | Anterior myocardial infarction NOS                   |
| G302.00       | Acute inferolateral infarction                       |
| G303.00       | Acute inferoposterior infarction                     |
| G304.00       | Posterior myocardial infarction NOS                  |
| G305.00       | Lateral myocardial infarction NOS                    |
| G306.00       | True posterior myocardial infarction                 |
| G307.00       | Acute subendocardial infarction                      |

|         |                                                            |
|---------|------------------------------------------------------------|
| G307000 | Acute non-Q wave infarction                                |
| G307100 | Acute non-ST segment elevation myocardial infarction       |
| G308.00 | Inferior myocardial infarction NOS                         |
| G309.00 | Acute Q-wave infarct                                       |
| G30A.00 | Mural thrombosis                                           |
| G30B.00 | Acute posterolateral myocardial infarction                 |
| G30X.00 | Acute transmural myocardial infarction of unspecif site    |
| G30X000 | Acute ST segment elevation myocardial infarction           |
| G30y.00 | Other acute myocardial infarction                          |
| G30y000 | Acute atrial infarction                                    |
| G30y100 | Acute papillary muscle infarction                          |
| G30y200 | Acute septal infarction                                    |
| G30yz00 | Other acute myocardial infarction NOS                      |
| G30z.00 | Acute myocardial infarction NOS                            |
| G31..00 | Other acute and subacute ischaemic heart disease           |
| G310.00 | Postmyocardial infarction syndrome                         |
| G310.11 | Dressler's syndrome                                        |
| G311.00 | Preinfarction syndrome                                     |
| G311.11 | Crescendo angina                                           |
| G311.12 | Impending infarction                                       |
| G311.13 | Unstable angina                                            |
| G311.14 | Angina at rest                                             |
| G311000 | Myocardial infarction aborted                              |
| G311011 | MI - myocardial infarction aborted                         |
| G311100 | Unstable angina                                            |
| G311200 | Angina at rest                                             |
| G311300 | Refractory angina                                          |
| G311400 | Worsening angina                                           |
| G311500 | Acute coronary syndrome                                    |
| G311z00 | Preinfarction syndrome NOS                                 |
| G312.00 | Coronary thrombosis not resulting in myocardial infarction |
| G31y.00 | Other acute and subacute ischaemic heart disease           |
| G31y000 | Acute coronary insufficiency                               |
| G31y100 | Microinfarction of heart                                   |
| G31y200 | Subendocardial ischaemia                                   |
| G31y300 | Transient myocardial ischaemia                             |
| G31yz00 | Other acute and subacute ischaemic heart disease NOS       |
| G32..00 | Old myocardial infarction                                  |
| G32..11 | Healed myocardial infarction                               |
| G32..12 | Personal history of myocardial infarction                  |
| G33..00 | Angina pectoris                                            |
| G330.00 | Angina decubitus                                           |



|         |                                                     |
|---------|-----------------------------------------------------|
| G330000 | Nocturnal angina                                    |
| G330z00 | Angina decubitus NOS                                |
| G331.00 | Prinzmetal's angina                                 |
| G331.11 | Variant angina pectoris                             |
| G332.00 | Coronary artery spasm                               |
| G33z.00 | Angina pectoris NOS                                 |
| G33z000 | Status anginosus                                    |
| G33z100 | Stenocardia                                         |
| G33z200 | Syncope anginosa                                    |
| G33z300 | Angina on effort                                    |
| G33z400 | Ischaemic chest pain                                |
| G33z500 | Post infarct angina                                 |
| G33z600 | New onset angina                                    |
| G33z700 | Stable angina                                       |
| G33zz00 | Angina pectoris NOS                                 |
| G34..00 | Other chronic ischaemic heart disease               |
| G340.00 | Coronary atherosclerosis                            |
| G340.11 | Triple vessel disease of the heart                  |
| G340.12 | Coronary artery disease                             |
| G340000 | Single coronary vessel disease                      |
| G340100 | Double coronary vessel disease                      |
| G341.00 | Aneurysm of heart                                   |
| G341.11 | Cardiac aneurysm                                    |
| G341000 | Ventricular cardiac aneurysm                        |
| G341100 | Other cardiac wall aneurysm                         |
| G341111 | Mural cardiac aneurysm                              |
| G341200 | Aneurysm of coronary vessels                        |
| G341300 | Acquired atrioventricular fistula of heart          |
| G341z00 | Aneurysm of heart NOS                               |
| G342.00 | Atherosclerotic cardiovascular disease              |
| G343.00 | Ischaemic cardiomyopathy                            |
| G344.00 | Silent myocardial ischaemia                         |
| G34y.00 | Other specified chronic ischaemic heart disease     |
| G34y000 | Chronic coronary insufficiency                      |
| G34y100 | Chronic myocardial ischaemia                        |
| G34yz00 | Other specified chronic ischaemic heart disease NOS |
| G34z.00 | Other chronic ischaemic heart disease NOS           |
| G34z000 | Asymptomatic coronary heart disease                 |
| G35..00 | Subsequent myocardial infarction                    |
| G350.00 | Subsequent myocardial infarction of anterior wall   |
| G351.00 | Subsequent myocardial infarction of inferior wall   |
| G353.00 | Subsequent myocardial infarction of other sites     |

|         |                                                              |
|---------|--------------------------------------------------------------|
| G35X.00 | Subsequent myocardial infarction of unspecified site         |
| G36..00 | Certain current complication follow acute myocardial infarct |
| G360.00 | Haemopericardium/current comp folow acut myocard infarct     |
| G361.00 | Atrial septal defect/curr comp folow acut myocardal infarct  |
| G362.00 | Ventric septal defect/curr comp fol acut myocardal infarctn  |
| G363.00 | Ruptur cardiac wall w'out haemopericard/cur comp fol ac MI   |
| G364.00 | Ruptur chordae tendinae/curr comp fol acute myocard infarct  |
| G365.00 | Rupture papillary muscle/curr comp fol acute myocard infarct |
| G366.00 | Thrombosis atrium,auric append&vent/curr comp foll acute MI  |
| G37..00 | Cardiac syndrome X                                           |
| G38..00 | Postoperative myocardial infarction                          |
| G380.00 | Postoperative transmural myocardial infarction anterior wall |
| G381.00 | Postoperative transmural myocardial infarction inferior wall |
| G382.00 | Postoperative transmural myocardial infarction other sites   |
| G383.00 | Postoperative transmural myocardial infarction unspec site   |
| G384.00 | Postoperative subendocardial myocardial infarction           |
| G38z.00 | Postoperative myocardial infarction, unspecified             |
| G39..00 | Coronary microvascular disease                               |
| G3y..00 | Other specified ischaemic heart disease                      |
| G3z..00 | Ischaemic heart disease NOS                                  |
| Gyu3.00 | [X]Ischaemic heart diseases                                  |
| Gyu3000 | [X]Other forms of angina pectoris                            |
| Gyu3100 | [X]Other current complicatns following acute myocard infarct |
| Gyu3200 | [X]Other forms of acute ischaemic heart disease              |
| Gyu3300 | [X]Other forms of chronic ischaemic heart disease            |
| Gyu3400 | [X]Acute transmural myocardial infarction of unspecif site   |
| Gyu3500 | [X]Subsequent myocardial infarction of other sites           |
| Gyu3600 | [X]Subsequent myocardial infarction of unspecified site      |

## Heart Failure

| Clinical Code | Description                                           |
|---------------|-------------------------------------------------------|
| 101..00       | Heart failure confirmed                               |
| 2JZ..00       | On optimal heart failure therapy                      |
| 662f.00       | New York Heart Association classification - class I   |
| 662g.00       | New York Heart Association classification - class II  |
| 662h.00       | New York Heart Association classification - class III |
| 662i.00       | New York Heart Association classification - class IV  |
| 8B29.00       | Cardiac failure therapy                               |
| G58..00       | Heart failure                                         |
| G58..11       | Cardiac failure                                       |

|         |                                                             |
|---------|-------------------------------------------------------------|
| G580.00 | Congestive heart failure                                    |
| G580.11 | Congestive cardiac failure                                  |
| G580.12 | Right heart failure                                         |
| G580.13 | Right ventricular failure                                   |
| G580.14 | Biventricular failure                                       |
| G580000 | Acute congestive heart failure                              |
| G580100 | Chronic congestive heart failure                            |
| G580200 | Decompensated cardiac failure                               |
| G580300 | Compensated cardiac failure                                 |
| G580400 | Congestive heart failure due to valvular disease            |
| G581.00 | Left ventricular failure                                    |
| G581.11 | Asthma - cardiac                                            |
| G581.13 | Impaired left ventricular function                          |
| G581000 | Acute left ventricular failure                              |
| G582.00 | Acute heart failure                                         |
| G583.00 | Heart failure with normal ejection fraction                 |
| G583.11 | HFNEF - heart failure with normal ejection fraction         |
| G583.12 | Heart failure with preserved ejection fraction              |
| G584.00 | Right ventricular failure                                   |
| G58z.00 | Heart failure NOS                                           |
| G58z.12 | Weak heart                                                  |
| G5y4z00 | Post cardiac operation heart failure NOS                    |
| 661M500 | Heart failure self-management plan agreed                   |
| 661N500 | Heart failure self-management plan review                   |
| 662p.00 | Heart failure 6 month review                                |
| 662T.00 | Congestive heart failure monitoring                         |
| 662W.00 | Heart failure annual review                                 |
| 679W100 | Education about deteriorating heart failure                 |
| 8H2S.00 | Admit heart failure emergency                               |
| 8HBE.00 | Heart failure follow-up                                     |
| 8HTL000 | Referral to rapid access heart failure clinic               |
| G232.00 | Hypertensive heart&renal dis wth (congestive) heart failure |
| G234.00 | Hyperten heart&renal dis+both(congestv)heart and renal fail |
| G581.12 | Pulmonary oedema - acute                                    |
| G58z.11 | Weak heart                                                  |
| SP11111 | Heart failure as a complication of care                     |
| SP11200 | Cardiorespiratory failure as a complication of care         |
| G554000 | Congestive cardiomyopathy                                   |

### Peripheral Vascular Disease

| Clinical Code | Description                                                  |
|---------------|--------------------------------------------------------------|
| 7A11211       | Y graft of abdominal Aortic aneurysm (emergency)             |
| 7A11311       | Y graft of abdominal Aortic aneurysm (emergency)             |
| 7A13.11       | Emergency repair of aortic aneurysm                          |
| 7A13411       | Tube graft abdominal Aortic aneurysm (emergency)             |
| 7A14.11       | Aortic aneurysm repair                                       |
| 7A14411       | Tube graft of Abdominal aortic aneurysm                      |
| C107.12       | Diabetes with gangrene                                       |
| G71..00       | Aortic aneurysm                                              |
| G710.00       | Dissecting aortic aneurysm                                   |
| G711.00       | Thoracic aortic aneurysm which has ruptured                  |
| G711.11       | Ruptured thoracic aortic aneurysm                            |
| G712.00       | Thoracic aortic aneurysm without mention of rupture          |
| G713.00       | Abdominal aortic aneurysm which has ruptured                 |
| G713.11       | Ruptured abdominal aortic aneurysm                           |
| G713000       | Ruptured suprarenal aortic aneurysm                          |
| G714.00       | Abdominal aortic aneurysm without mention of rupture         |
| G714.11       | AAA - Abdominal aortic aneurysm without mention of rupture   |
| G714000       | Juxtarenal aortic aneurysm                                   |
| G714100       | Inflammatory abdominal aortic aneurysm                       |
| G715.00       | Ruptured aortic aneurysm NOS                                 |
| G715000       | Thoracoabdominal aortic aneurysm, ruptured                   |
| G716.00       | Aortic aneurysm without mention of rupture NOS               |
| G716000       | Thoracoabdominal aortic aneurysm, without mention of rupture |
| G718.00       | Leaking abdominal aortic aneurysm                            |
| G71z.00       | Aortic aneurysm NOS                                          |
| G73..00       | Other peripheral vascular disease                            |
| G73..11       | Peripheral ischaemic vascular disease                        |
| G731100       | Vibratory white finger                                       |
| G732.00       | Peripheral gangrene                                          |
| G732000       | Gangrene of toe                                              |
| G732100       | Gangrene of foot                                             |
| G732200       | Gangrene of finger                                           |
| G732300       | Gangrene of thumb                                            |
| G732400       | Gangrene of hand                                             |
| G73y.00       | Other specified peripheral vascular disease                  |
| G73yz00       | Other specified peripheral vascular disease NOS              |
| G73z.00       | Peripheral vascular disease NOS                              |
| G73z000       | Intermittent claudication                                    |
| G73z011       | Claudication                                                 |
| G73zz00       | Peripheral vascular disease NOS                              |
| Gyu7100       | [X]Aortic aneurysm of unspecified site, ruptured             |
| Gyu7200       | [X]Aortic aneurysm of unspecified site, nonruptured          |

|         |                                                 |
|---------|-------------------------------------------------|
| Gyu7400 | [X]Other specified peripheral vascular diseases |
| R054.00 | [D]Gangrene                                     |
| R054000 | [D]Gangrene, spreading cutaneous                |
| R054200 | [D]Gangrene of toe in diabetic                  |
| R054300 | [D]Widespread diabetic foot gangrene            |
| R054z00 | [D]Gangrene NOS                                 |
| G714200 | Infrarenal abdominal aortic aneurysm            |
| G714300 | Aneurysm of suprarenal aorta                    |
| G717.00 | Aortic aneurysm - syphilitic                    |
| G71A.00 | Aortic root dilatation                          |
| G72..00 | Other aneurysm                                  |
| G720.00 | Aneurysm of artery of arm                       |
| G720000 | Aneurysm of brachial artery                     |
| G720100 | Aneurysm of radial artery                       |
| G720200 | Aneurysm of ulnar artery                        |
| G720z00 | Aneurysm of arm artery NOS                      |
| G721.00 | Aneurysm of renal artery                        |
| G721000 | Acquired renal artery aneurysm                  |
| G721100 | Congenital renal artery aneurysm                |
| G722.00 | Aneurysm of iliac artery                        |
| G722000 | Aneurysm of common iliac artery                 |
| G722100 | Aneurysm of external iliac artery               |
| G722200 | Aneurysm of internal iliac artery               |
| G722z00 | Aneurysm of iliac artery NOS                    |
| G723.00 | Aneurysm of leg artery                          |
| G723000 | Aneurysm of femoral artery                      |
| G723100 | Aneurysm of popliteal artery                    |
| G723200 | Aneurysm of anterior tibial artery              |
| G723300 | Aneurysm of dorsalis pedis artery               |
| G723400 | Aneurysm of posterior tibial artery             |
| G723500 | Ruptured popliteal artery aneurysm              |
| G723z00 | Aneurysm of leg artery NOS                      |
| G725.00 | Dissection of artery of upper extremity         |
| G725.11 | Dissection of artery of arm                     |
| G726.00 | Dissection of renal artery                      |
| G727.00 | Dissection of iliac artery                      |
| G728.00 | Dissection of artery of lower extremity         |
| G728.11 | Dissection of artery of leg                     |
| G729.00 | Aneurysm and dissection of precerebral artery   |
| G72A.00 | Dissection of other specified arteries          |
| G72B.00 | Dissection of artery                            |
| G72B000 | Dissection of transplant artery                 |
| G72y.00 | Aneurysm of other artery                        |
| G72y000 | Aneurysm of common carotid art                  |

|         |                                            |
|---------|--------------------------------------------|
| G72y100 | Aneurysm of external carotid artery        |
| G72y200 | Aneurysm of internal carotid artery        |
| G72y300 | Aneurysm of neck artery NOS                |
| G72y400 | Aneurysm of subclavian artery              |
| G72y500 | Aneurysm of splenic artery                 |
| G72y600 | Aneurysm of axillary artery                |
| G72y700 | Aneurysm of coeliac artery                 |
| G72y800 | Aneurysm of superior mesenteric artery     |
| G72y900 | Aneurysm of inferior mesenteric artery     |
| G72yA00 | Aneurysm of hepatic artery                 |
| G72yB00 | Aneurysm of other visceral artery          |
| G72yz00 | Vertebral artery aneurysm                  |
| G72z.00 | Other aneurysm NOS                         |
| G73..12 | Ischaemia of legs                          |
| G73..13 | Peripheral ischaemia                       |
| G731.00 | Raynaud's syndrome                         |
| G731000 | Raynaud's disease                          |
| G731z00 | Thromboangiitis obliterans NOS             |
| G733.00 | Ischaemic foot                             |
| G734.00 | Peripheral arterial disease                |
| G73y000 | Diabetic peripheral angiopathy             |
| G73y100 | Peripheral angiopathic disease EC NOS      |
| G73y200 | Acrocyanosis                               |
| G73z012 | Vascular claudication                      |
| G73z100 | Spasm of peripheral artery                 |
| Gyu7300 | [X]Aneurysm of other specified arteries    |
| 14AE.00 | H/O: aortic aneurysm                       |
| 14NB.00 | H/O: Peripheral vascular disease procedure |
| 2I16.00 | O/E - gangrene                             |
| g71..00 | Aortic aneurysm                            |

### Stroke/Trans-ischaemic attack

| Clinical code | Description                                                  |
|---------------|--------------------------------------------------------------|
| G6...00       | Cerebrovascular disease                                      |
| G60..00       | Subarachnoid haemorrhage                                     |
| G600.00       | Ruptured berry aneurysm                                      |
| G601.00       | Subarachnoid haemorrhage from carotid siphon and bifurcation |
| G602.00       | Subarachnoid haemorrhage from middle cerebral artery         |
| G603.00       | Subarachnoid haemorrhage from anterior communicating artery  |
| G604.00       | Subarachnoid haemorrhage from posterior communicating artery |
| G605.00       | Subarachnoid haemorrhage from basilar artery                 |
| G606.00       | Subarachnoid haemorrhage from vertebral artery               |

|         |                                                              |
|---------|--------------------------------------------------------------|
| G60X.00 | Subarachnoid haemorrh from intracranial artery, unspecif     |
| G60z.00 | Subarachnoid haemorrhage NOS                                 |
| G61..00 | Intracerebral haemorrhage                                    |
| G61..11 | CVA - cerebrovascular accid due to intracerebral haemorrhage |
| G61..12 | Stroke due to intracerebral haemorrhage                      |
| G610.00 | Cortical haemorrhage                                         |
| G611.00 | Internal capsule haemorrhage                                 |
| G612.00 | Basal nucleus haemorrhage                                    |
| G613.00 | Cerebellar haemorrhage                                       |
| G614.00 | Pontine haemorrhage                                          |
| G615.00 | Bulbar haemorrhage                                           |
| G616.00 | External capsule haemorrhage                                 |
| G617.00 | Intracerebral haemorrhage, intraventricular                  |
| G618.00 | Intracerebral haemorrhage, multiple localized                |
| G619.00 | Lobar cerebral haemorrhage                                   |
| G61X.00 | Intracerebral haemorrhage in hemisphere, unspecified         |
| G61X000 | Left sided intracerebral haemorrhage, unspecified            |
| G61X100 | Right sided intracerebral haemorrhage, unspecified           |
| G61z.00 | Intracerebral haemorrhage NOS                                |
| G62..00 | Other and unspecified intracranial haemorrhage               |
| G620.00 | Extradural haemorrhage - nontraumatic                        |
| G621.00 | Subdural haemorrhage - nontraumatic                          |
| G622.00 | Subdural haematoma - nontraumatic                            |
| G623.00 | Subdural haemorrhage NOS                                     |
| G62z.00 | Intracranial haemorrhage NOS                                 |
| G63..00 | Precerebral arterial occlusion                               |
| G63..11 | Infarction - precerebral                                     |
| G63..12 | Stenosis of precerebral arteries                             |
| G630.00 | Basilar artery occlusion                                     |
| G631.00 | Carotid artery occlusion                                     |
| G631.11 | Stenosis, carotid artery                                     |
| G631.12 | Thrombosis, carotid artery                                   |
| G632.00 | Vertebral artery occlusion                                   |
| G633.00 | Multiple and bilateral precerebral arterial occlusion        |
| G634.00 | Carotid artery stenosis                                      |
| G63y.00 | Other precerebral artery occlusion                           |
| G63y000 | Cerebral infarct due to thrombosis of precerebral arteries   |
| G63y100 | Cerebral infarction due to embolism of precerebral arteries  |
| G63z.00 | Precerebral artery occlusion NOS                             |
| G64..00 | Cerebral arterial occlusion                                  |
| G64..11 | CVA - cerebral artery occlusion                              |
| G64..12 | Infarction - cerebral                                        |

|         |                                                            |
|---------|------------------------------------------------------------|
| G64..13 | Stroke due to cerebral arterial occlusion                  |
| G640.00 | Cerebral thrombosis                                        |
| G640000 | Cerebral infarction due to thrombosis of cerebral arteries |
| G641.00 | Cerebral embolism                                          |
| G641.11 | Cerebral embolus                                           |
| G641000 | Cerebral infarction due to embolism of cerebral arteries   |
| G64z.00 | Cerebral infarction NOS                                    |
| G64z.11 | Brainstem infarction NOS                                   |
| G64z.12 | Cerebellar infarction                                      |
| G64z000 | Brainstem infarction                                       |
| G64z100 | Wallenberg syndrome                                        |
| G64z111 | Lateral medullary syndrome                                 |
| G64z200 | Left sided cerebral infarction                             |
| G64z300 | Right sided cerebral infarction                            |
| G64z400 | Infarction of basal ganglia                                |
| G65..00 | Transient cerebral ischaemia                               |
| G65..11 | Drop attack                                                |
| G65..12 | Transient ischaemic attack                                 |
| G65..13 | Vertebro-basilar insufficiency                             |
| G650.00 | Basilar artery syndrome                                    |
| G650.11 | Insufficiency - basilar artery                             |
| G651.00 | Vertebral artery syndrome                                  |
| G651000 | Vertebro-basilar artery syndrome                           |
| G652.00 | Subclavian steal syndrome                                  |
| G653.00 | Carotid artery syndrome hemispheric                        |
| G654.00 | Multiple and bilateral precerebral artery syndromes        |
| G655.00 | Transient global amnesia                                   |
| G656.00 | Vertebrobasilar insufficiency                              |
| G657.00 | Carotid territory transient ischaemic attack               |
| G65y.00 | Other transient cerebral ischaemia                         |
| G65z.00 | Transient cerebral ischaemia NOS                           |
| G65z000 | Impending cerebral ischaemia                               |
| G65z100 | Intermittent cerebral ischaemia                            |
| G65zz00 | Transient cerebral ischaemia NOS                           |
| G66..00 | Stroke and cerebrovascular accident unspecified            |
| G66..11 | CVA unspecified                                            |
| G66..12 | Stroke unspecified                                         |
| G66..13 | CVA - Cerebrovascular accident unspecified                 |
| G660.00 | Middle cerebral artery syndrome                            |
| G661.00 | Anterior cerebral artery syndrome                          |
| G662.00 | Posterior cerebral artery syndrome                         |
| G663.00 | Brain stem stroke syndrome                                 |



|         |                                                              |
|---------|--------------------------------------------------------------|
| G664.00 | Cerebellar stroke syndrome                                   |
| G665.00 | Pure motor lacunar syndrome                                  |
| G666.00 | Pure sensory lacunar syndrome                                |
| G667.00 | Left sided CVA                                               |
| G668.00 | Right sided CVA                                              |
| G669.00 | Cerebral palsy, not congenital or infantile, acute           |
| G67..00 | Other cerebrovascular disease                                |
| G670.00 | Cerebral atherosclerosis                                     |
| G670.11 | Precerebral atherosclerosis                                  |
| G671.00 | Generalised ischaemic cerebrovascular disease NOS            |
| G671000 | Acute cerebrovascular insufficiency NOS                      |
| G671100 | Chronic cerebral ischaemia                                   |
| G671z00 | Generalised ischaemic cerebrovascular disease NOS            |
| G672.00 | Hypertensive encephalopathy                                  |
| G672.11 | Hypertensive crisis                                          |
| G673.00 | Cerebral aneurysm, nonruptured                               |
| G673000 | Dissection of cerebral arteries, nonruptured                 |
| G673100 | Carotico-cavernous sinus fistula                             |
| G673200 | Carotid artery dissection                                    |
| G673300 | Vertebral artery dissection                                  |
| G674.00 | Cerebral arteritis                                           |
| G674000 | Cerebral amyloid angiopathy                                  |
| G675.00 | Moyamoya disease                                             |
| G676.00 | Nonpyogenic venous sinus thrombosis                          |
| G676000 | Cereb infarct due cerebral venous thrombosis, nonpyogenic    |
| G677.00 | Occlusion/stenosis cerebral arts not result cerebral infarct |
| G677000 | Occlusion and stenosis of middle cerebral artery             |
| G677100 | Occlusion and stenosis of anterior cerebral artery           |
| G677200 | Occlusion and stenosis of posterior cerebral artery          |
| G677300 | Occlusion and stenosis of cerebellar arteries                |
| G677400 | Occlusion+stenosis of multiple and bilat cerebral arteries   |
| G678.00 | Cereb autosom dominant arteriop subcort infarcts leukoenceph |
| G679.00 | Small vessel cerebrovascular disease                         |
| G67A.00 | Cerebral vein thrombosis                                     |
| G67B.00 | Reversible cerebral vasoconstriction syndrome                |
| G67B.11 | Call-Fleming syndrome                                        |
| G67y.00 | Other cerebrovascular disease OS                             |
| G67z.00 | Other cerebrovascular disease NOS                            |
| G68..00 | Late effects of cerebrovascular disease                      |
| G680.00 | Sequelae of subarachnoid haemorrhage                         |
| G681.00 | Sequelae of intracerebral haemorrhage                        |
| G682.00 | Sequelae of other nontraumatic intracranial haemorrhage      |

|         |                                                              |
|---------|--------------------------------------------------------------|
| G683.00 | Sequelae of cerebral infarction                              |
| G68W.00 | Sequelae/other + unspecified cerebrovascular diseases        |
| G68X.00 | Sequelae of stroke,not specfd as h'morrhage or infarction    |
| G6y..00 | Other specified cerebrovascular disease                      |
| G6z..00 | Cerebrovascular disease NOS                                  |
| Gyu6.00 | [X]Cerebrovascular diseases                                  |
| Gyu6000 | [X]Subarachnoid haemorrhage from other intracranial arteries |
| Gyu6100 | [X]Other subarachnoid haemorrhage                            |
| Gyu6200 | [X]Other intracerebral haemorrhage                           |
| Gyu6300 | [X]Cerebrl infarctn due/unspcf occlusn or sten/cerebrl artr  |
| Gyu6400 | [X]Other cerebral infarction                                 |
| Gyu6500 | [X]Occlusion and stenosis of other precerebral arteries      |
| Gyu6600 | [X]Occlusion and stenosis of other cerebral arteries         |
| Gyu6700 | [X]Other specified cerebrovascular diseases                  |
| Gyu6C00 | [X]Sequelae of stroke;not specfd as h'morrhage or infarction |
| Gyu6D00 | [X]Sequelae/other unspecified cerebrovascular diseases       |
| Gyu6E00 | [X]Subarachnoid haemorrh from intracranial artery, unspecif  |
| Gyu6F00 | [X]Intracerebral haemorrhage in hemisphere, unspecified      |
| Gyu6G00 | [X]Cerebr infarct due unsp occlus/stenos precerebr arteries  |
| G6W..00 | Cerebr infarct due unsp occlus/stenos precerebr arteries     |
| G6X..00 | Cerebrl infarctn due/unspcf occlusn or sten/cerebrl artr     |

## Hypertension

| Clinical Code | Description                                      |
|---------------|--------------------------------------------------|
| G2...00       | Hypertensive disease                             |
| G2...11       | BP - hypertensive disease                        |
| G20..00       | Essential hypertension                           |
| G20..11       | High blood pressure                              |
| G20..12       | Primary hypertension                             |
| G200.00       | Malignant essential hypertension                 |
| G201.00       | Benign essential hypertension                    |
| G202.00       | Systolic hypertension                            |
| G203.00       | Diastolic hypertension                           |
| G20z.00       | Essential hypertension NOS                       |
| G20z.11       | Hypertension NOS                                 |
| G21..00       | Hypertensive heart disease                       |
| G210.00       | Malignant hypertensive heart disease             |
| G210000       | Malignant hypertensive heart disease without CCF |
| G210100       | Malignant hypertensive heart disease with CCF    |
| G210z00       | Malignant hypertensive heart disease NOS         |

|         |                                                               |
|---------|---------------------------------------------------------------|
| G211.00 | Benign hypertensive heart disease                             |
| G211000 | Benign hypertensive heart disease without CCF                 |
| G211100 | Benign hypertensive heart disease with CCF                    |
| G211z00 | Benign hypertensive heart disease NOS                         |
| G21z.00 | Hypertensive heart disease NOS                                |
| G21z000 | Hypertensive heart disease NOS without CCF                    |
| G21z011 | Cardiomegaly - hypertensive                                   |
| G21z100 | Hypertensive heart disease NOS with CCF                       |
| G21zz00 | Hypertensive heart disease NOS                                |
| G22..00 | Hypertensive renal disease                                    |
| G22..11 | Nephrosclerosis                                               |
| G220.00 | Malignant hypertensive renal disease                          |
| G221.00 | Benign hypertensive renal disease                             |
| G222.00 | Hypertensive renal disease with renal failure                 |
| G22z.00 | Hypertensive renal disease NOS                                |
| G22z.11 | Renal hypertension                                            |
| G23..00 | Hypertensive heart and renal disease                          |
| G230.00 | Malignant hypertensive heart and renal disease                |
| G231.00 | Benign hypertensive heart and renal disease                   |
| G232.00 | Hypertensive heart&renal dis wth (congestive) heart failure   |
| G233.00 | Hypertensive heart and renal disease with renal failure       |
| G234.00 | Hyperten heart&renal dis+both(congestv)heart and renal fail   |
| G23z.00 | Hypertensive heart and renal disease NOS                      |
| G24..00 | Secondary hypertension                                        |
| G240.00 | Secondary malignant hypertension                              |
| G240000 | Secondary malignant renovascular hypertension                 |
| G240z00 | Secondary malignant hypertension NOS                          |
| G241.00 | Secondary benign hypertension                                 |
| G241000 | Secondary benign renovascular hypertension                    |
| G241z00 | Secondary benign hypertension NOS                             |
| G244.00 | Hypertension secondary to endocrine disorders                 |
| G24z.00 | Secondary hypertension NOS                                    |
| G24z000 | Secondary renovascular hypertension NOS                       |
| G24z100 | Hypertension secondary to drug                                |
| G24zz00 | Secondary hypertension NOS                                    |
| G25..00 | Stage 1 hypertension (NICE - Nat Ins for Hth Clin Excl 2011)  |
| G25..11 | Stage 1 hypertension                                          |
| G250.00 | Stage 1 hyperten (NICE 2011) without evidnce end organ damage |
| G251.00 | Stage 1 hyperten (NICE 2011) with evidnce end organ damage    |
| G26..00 | Severe hypertension (Nat Inst for Health Clinical Ex 2011)    |
| G26..11 | Severe hypertension                                           |
| G27..00 | Hypertension resistant to drug therapy                        |

|         |                                                              |
|---------|--------------------------------------------------------------|
| G28..00 | Stage 2 hypertension (NICE - Nat Ins for Hth Clin Excl 2011) |
| G2y..00 | Other specified hypertensive disease                         |
| G2z..00 | Hypertensive disease NOS                                     |
| Gyu2.00 | [X]Hypertensive diseases                                     |
| Gyu2000 | [X]Other secondary hypertension                              |
| Gyu2100 | [X]Hypertension secondary to other renal disorders           |

### Lipid Lowering Drugs

| Clinical code | Description                                                       |
|---------------|-------------------------------------------------------------------|
| 81048998      | Atorvastatin 20mg chewable tablets sugar free                     |
| 81051998      | Atorvastatin 10mg chewable tablets sugar free                     |
| 83099998      | Simvastatin 40mg/5ml oral suspension sugar free                   |
| 82655998      | Nicotinic acid & laropiprant 1g+20mg tablets                      |
| 83030998      | Simvastatin 80mg tablets                                          |
| 81050998      | Atorvastatin 10mg chewable tablets sugar free                     |
| 84268998      | Colesevelam 625mg tablets                                         |
| 84267998      | Colesevelam 625mg tablets                                         |
| 83594998      | Nicotinic acid 1g / laropiprant 20mg modified-release tablets     |
| 79254979      | Simvastatin 20mg/5ml oral suspension sugar free                   |
| 83188998      | Bezafibrate 200mg tablets                                         |
| 83187998      | Bezafibrate 400mg modified-release tablets                        |
| 81049998      | Atorvastatin 20mg chewable tablets sugar free                     |
| 82141978      | Eicosapentaenoic acid 460mg / Docosahexaenoic acid 380mg capsules |
| 87853998      | Nicotinic acid 1g modified-release tablets                        |
| 87852998      | Nicotinic acid 500mg modified release tablets                     |
| 89154996      | Cerivastatin 300microgram tablets                                 |
| 86791998      | Simvastatin 80mg / Ezetimibe 10mg tablets                         |
| 87854998      | Nicotinic acid 750mg modified-release tablets                     |
| 89153996      | Cerivastatin sodium 300mcg tablets                                |
| 88298997      | Fenofibrate micronised 267mg capsules                             |
| 88534998      | Rosuvastatin 10mg tablets                                         |
| 86794998      | Simvastatin 80mg / Ezetimibe 10mg tablets                         |
| 86510979      | Ispaghula husk 3.5g sugar free granules                           |
| 87025998      | Bezafibrate 400mg modified-release tablets                        |
| 87418998      | Simvastatin 10mg tablets                                          |
| 87918998      | Simvastatin 10mg tablets                                          |
| 89401998      | Bezafibrate 400mg modified-release tablets                        |
| 87917998      | Simvastatin 20mg tablets                                          |
| 89089998      | Bezafibrate 400mg modified release tablets                        |

|          |                                                                   |
|----------|-------------------------------------------------------------------|
| 87373998 | Simvastatin 10mg tablets                                          |
| 87760998 | Colestipol 5g granules sachets sugar free                         |
| 86798998 | Simvastatin 20mg / Ezetimibe 10mg tablets                         |
| 88297996 | Fenofibrate micronised 267mg capsules                             |
| 87848998 | Nicotinic acid pack                                               |
| 86796998 | Simvastatin 40mg / Ezetimibe 10mg tablets                         |
| 87849998 | Nicotinic acid 375mg + 500mg + 750mg modified-release tablet      |
| 87850998 | Nicotinic acid 1g modified release tablets                        |
| 87851998 | Nicotinic acid 750mg modified release tablets                     |
| 86797998 | Simvastatin 20mg / Ezetimibe 10mg tablets                         |
| 87916998 | Simvastatin 40mg tablets                                          |
| 89306996 | Atorvastatin 40mg tablets                                         |
| 89311998 | Atorvastatin 10mg tablets                                         |
| 89617998 | Ispaghula husk 3.5g sugar free granules                           |
| 89154997 | Cerivastatin 200microgram tablets                                 |
| 86795998 | Simvastatin 40mg / Ezetimibe 10mg tablets                         |
| 89311997 | Atorvastatin 20mg tablets                                         |
| 89306998 | Atorvastatin 10mg tablets                                         |
| 89311996 | Atorvastatin 40mg tablets                                         |
| 88298996 | Fenofibrate micronised 200mg capsules                             |
| 86788998 | Simvastatin 40mg / Ezetimibe 10mg tablets                         |
| 86789998 | Simvastatin 20mg / Ezetimibe 10mg tablets                         |
| 89153998 | Cerivastatin sodium 100mcg tablets                                |
| 86787998 | Simvastatin 80mg / Ezetimibe 10mg tablets                         |
| 89154998 | Cerivastatin 100microgram tablets                                 |
| 88297998 | Fenofibrate micronised 67mg capsules                              |
| 86467998 | Rosuvastatin 5mg tablets                                          |
| 89285979 | Nicotinic acid 500mg modified release tablets                     |
| 89800998 | Eicosapentaenoic acid 460mg / Docosahexaenoic acid 380mg capsules |
| 89284979 | Nicotinic acid 750mg modified release tablets                     |
| 88298998 | Fenofibrate micronised 67mg capsules                              |
| 88297997 | Fenofibrate micronised 200mg capsules                             |
| 89306997 | Atorvastatin 20mg tablets                                         |
| 87855998 | Nicotinic acid 500mg modified-release tablets                     |
| 89283979 | Nicotinic acid 1g modified release tablets                        |
| 89153997 | Cerivastatin sodium 200mcg tablets                                |
| 86468998 | Rosuvastatin 5mg tablets                                          |
| 92447998 | Cerivastatin sodium 400mcg tablets                                |
| 90973998 | Rosuvastatin 20mg tablets                                         |
| 93619998 | Simvastatin 10mg tablets                                          |
| 92408998 | Rosuvastatin 20mg tablets                                         |

|          |                                                 |
|----------|-------------------------------------------------|
| 93620996 | Simvastatin 40mg tablets                        |
| 92448997 | Cerivastatin 800microgram tablets               |
| 92410998 | Rosuvastatin 40mg tablets                       |
| 93620997 | Simvastatin 20mg tablets                        |
| 93620998 | Simvastatin 10mg tablets                        |
| 93871990 | Simvastatin 40mg tablets                        |
| 92409998 | Rosuvastatin 10mg tablets                       |
| 93243996 | Pravastatin 40mg tablets                        |
| 91194998 | Fluvastatin 80mg modified-release tablets       |
| 93010990 | Colestyramine 4g oral powder sachets sugar free |
| 92549990 | Fenofibrate micronised 200mg capsules           |
| 93244998 | Pravastatin 10mg tablets                        |
| 93244997 | Pravastatin 20mg tablets                        |
| 93244996 | Pravastatin 40mg tablets                        |
| 92539998 | Rosuvastatin 40mg tablets                       |
| 90310998 | Atorvastatin 80mg tablets                       |
| 93243997 | Pravastatin 20mg tablets                        |
| 92448998 | Cerivastatin 400microgram tablets               |
| 94407990 | Simvastatin 20mg tablets                        |
| 93838990 | Bezafibrate 200mg tablets                       |
| 92471998 | Simvastatin 80mg tablets                        |
| 93851992 | Colestipol 5g granules sachets sugar free       |
| 90309998 | Atorvastatin 80mg tablets                       |
| 92460998 | Fenofibrate micronised 160mg tablets            |
| 91316998 | Colestyramine sugar free powder                 |
| 93243998 | Pravastatin 10mg tablets                        |
| 92292998 | Ezetimibe 10mg tablets                          |
| 92154990 | Simvastatin 20mg/5ml oral suspension sugar free |
| 93541998 | Colestyramine 4g oral powder sachets            |
| 93542998 | Colestyramine 4g oral powder sachets sugar free |
| 92804997 | Fluvastatin 40mg capsules                       |
| 94189997 | Fenofibrate micronised 200mg capsules           |
| 92293998 | Ezetimibe 10mg tablets                          |
| 90649998 | Fenofibrate 200mg capsules                      |
| 92805998 | Fluvastatin 20mg capsules                       |
| 92804998 | Fluvastatin 20mg capsules                       |
| 92805997 | Fluvastatin 40mg capsules                       |
| 93619996 | Simvastatin 40mg tablets                        |
| 92220998 | Simvastatin 80mg tablets                        |
| 90653998 | Colestyramine 4g oral powder sachets sugar free |
| 94188997 | Fenofibrate micronised 200mg capsules           |
| 94112992 | Cholestyramine 325 mg cap                       |

|          |                                                                   |
|----------|-------------------------------------------------------------------|
| 94188998 | Fenofibrate 100mg capsule                                         |
| 94189998 | Fenofibrate 100mg capsules                                        |
| 92804996 | Fluvastatin 80mg modified-release tablets                         |
| 93619997 | Simvastatin 20mg tablets                                          |
| 95480990 | Simvastatin 10mg tablets                                          |
| 95479990 | Simvastatin 20mg tablets                                          |
| 95952997 | Bezafibrate 400mg modified-release tablets                        |
| 95550990 | Simvastatin 20mg tablets                                          |
| 95551990 | Simvastatin 10mg tablets                                          |
| 94925998 | Eicosapentaenoic acid 170mg / Docosahexaenoic acid 115mg capsules |
| 95478990 | Simvastatin 40mg tablets                                          |
| 95471990 | Simvastatin 40mg tablets                                          |
| 95475990 | Simvastatin 20mg tablets                                          |
| 94799998 | Fenofibrate micronised 160mg tablets                              |
| 96295997 | Gemfibrozil 600mg tablets                                         |
| 95474990 | Simvastatin 40mg tablets                                          |
| 95472990 | Simvastatin 20mg tablets                                          |
| 95451990 | Simvastatin 10mg tablets                                          |
| 95549990 | Simvastatin 40mg tablets                                          |
| 96295998 | Gemfibrozil 300mg capsules                                        |
| 94927990 | Simvastatin 80mg tablets                                          |
| 94827992 | Colestyramine 4g oral powder sachets                              |
| 95501990 | Simvastatin 40mg tablets                                          |
| 94782990 | Pravastatin 20mg tablets                                          |
| 95185990 | Simvastatin 80mg tablets                                          |
| 95494990 | Simvastatin 20mg tablets                                          |
| 94605998 | Colestipol 5g granules sachets sugar free                         |
| 95495990 | Simvastatin 10mg tablets                                          |
| 94851990 | Pravastatin 10mg tablets                                          |
| 95500990 | Simvastatin 80mg tablets                                          |
| 94830990 | Pravastatin 20mg tablets                                          |
| 95502990 | Simvastatin 20mg tablets                                          |
| 97078998 | Fish oil concentrate 1g capsules                                  |
| 96685990 | Bezafibrate 400mg modified-release tablets                        |
| 96685989 | Bezafibrate 200mg tablets                                         |
| 97377979 | Cerivastatin sodium 300mcg tablets                                |
| 94831990 | Pravastatin 10mg tablets                                          |
| 97078997 | Fish oil concentrate oral liquid                                  |
| 94661998 | Colestipol 5g granules sachets sugar free                         |
| 95482990 | Simvastatin 20mg tablets                                          |
| 95483990 | Simvastatin 10mg tablets                                          |

|          |                                                 |
|----------|-------------------------------------------------|
| 95486990 | Simvastatin 40mg tablets                        |
| 95508990 | Simvastatin 10mg tablets                        |
| 95487990 | Simvastatin 20mg tablets                        |
| 95952998 | Bezafibrate 200mg tablets                       |
| 97078996 | Fish oil concentrate oral emulsion              |
| 94850990 | Pravastatin 20mg tablets                        |
| 94849990 | Pravastatin 40mg tablets                        |
| 94662998 | Colestipol 5g granules sachets sugar free       |
| 95493990 | Simvastatin 40mg tablets                        |
| 95847990 | Colestyramine 4g oral powder sachets sugar free |
| 95098992 | Hexopal 200 mg tab                              |
| 97455979 | Pravastatin 10mg tablets                        |
| 95481990 | Simvastatin 40mg tablets                        |
| 94661997 | Colestipol 5g granules sachets sugar free       |
| 97430979 | Fluvastatin 20mg capsules                       |
| 95805998 | Bezafibrate 400mg modified release tablets      |
| 95405990 | Simvastatin 40mg tablets                        |
| 94789990 | Pravastatin 10mg tablets                        |
| 95401998 | Probucol 250mg tablet                           |
| 97247997 | Gemfibrozil 600mg tablets                       |
| 97247998 | Gemfibrozil 300mg capsules                      |
| 96134990 | Colestyramine 4g oral powder sachets            |
| 95278990 | Simvastatin 20mg tablets                        |
| 95277990 | Simvastatin 40mg tablets                        |
| 95372990 | Simvastatin 40mg tablets                        |



Table S2. The RECORD statement – checklist of items, extended from the STROBE statement, that should be reported in observational studies using routinely collected health data.

|                           | Item No. | STROBE items                                                                                                                                                                               | Location in manuscript where items are reported | RECORD items                                                                                                                                                                                                                                                                                                                                                                                                                                       | Location in manuscript where items are reported                     |
|---------------------------|----------|--------------------------------------------------------------------------------------------------------------------------------------------------------------------------------------------|-------------------------------------------------|----------------------------------------------------------------------------------------------------------------------------------------------------------------------------------------------------------------------------------------------------------------------------------------------------------------------------------------------------------------------------------------------------------------------------------------------------|---------------------------------------------------------------------|
| <b>Title and abstract</b> |          |                                                                                                                                                                                            |                                                 |                                                                                                                                                                                                                                                                                                                                                                                                                                                    |                                                                     |
|                           | 1        | (a) Indicate the study’s design with a commonly used term in the title or the abstract (b) Provide in the abstract an informative and balanced summary of what was done and what was found | Abstract                                        | <p>RECORD 1.1: The type of data used should be specified in the title or abstract. When possible, the name of the databases used should be included.</p> <p>RECORD 1.2: If applicable, the geographic region and timeframe within which the study took place should be reported in the title or abstract.</p> <p>RECORD 1.3: If linkage between databases was conducted for the study, this should be clearly stated in the title or abstract.</p> | Abstract Study time has been noted in the study population section. |
| <b>Introduction</b>       |          |                                                                                                                                                                                            |                                                 |                                                                                                                                                                                                                                                                                                                                                                                                                                                    |                                                                     |
| Background rationale      | 2        | Explain the scientific background and rationale for the investigation being reported                                                                                                       | Introduction paragraphs 1-6                     |                                                                                                                                                                                                                                                                                                                                                                                                                                                    |                                                                     |
| Objectives                | 3        | State specific objectives, including any prespecified hypotheses                                                                                                                           | Introduction paragraph 7                        |                                                                                                                                                                                                                                                                                                                                                                                                                                                    |                                                                     |
| <b>Methods</b>            |          |                                                                                                                                                                                            |                                                 |                                                                                                                                                                                                                                                                                                                                                                                                                                                    |                                                                     |
| Study Design              | 4        | Present key elements of study design early in the paper                                                                                                                                    | Method: Study Design and Data Source            |                                                                                                                                                                                                                                                                                                                                                                                                                                                    |                                                                     |
| Setting                   | 5        | Describe the setting, locations, and relevant dates, including                                                                                                                             | Method: Study Population                        |                                                                                                                                                                                                                                                                                                                                                                                                                                                    |                                                                     |

|                              |   |                                                                                                                                                                                                                                                                                                                                                                                                                                                                                                                                                                                                                                                                                                                              |                          |                                                                                                                                                                                                                                                                                                                                                                                                                                                                                                                                                                                                                                                                                                      |                                                                                                                                                                     |
|------------------------------|---|------------------------------------------------------------------------------------------------------------------------------------------------------------------------------------------------------------------------------------------------------------------------------------------------------------------------------------------------------------------------------------------------------------------------------------------------------------------------------------------------------------------------------------------------------------------------------------------------------------------------------------------------------------------------------------------------------------------------------|--------------------------|------------------------------------------------------------------------------------------------------------------------------------------------------------------------------------------------------------------------------------------------------------------------------------------------------------------------------------------------------------------------------------------------------------------------------------------------------------------------------------------------------------------------------------------------------------------------------------------------------------------------------------------------------------------------------------------------------|---------------------------------------------------------------------------------------------------------------------------------------------------------------------|
|                              |   | periods of recruitment, exposure, follow-up, and data collection                                                                                                                                                                                                                                                                                                                                                                                                                                                                                                                                                                                                                                                             |                          |                                                                                                                                                                                                                                                                                                                                                                                                                                                                                                                                                                                                                                                                                                      |                                                                                                                                                                     |
| Participants                 | 6 | <p>(a) <i>Cohort study</i> - Give the eligibility criteria, and the sources and methods of selection of participants. Describe methods of follow-up</p> <p><i>Case-control study</i> - Give the eligibility criteria, and the sources and methods of case ascertainment and control selection. Give the rationale for the choice of cases and controls</p> <p><i>Cross-sectional study</i> - Give the eligibility criteria, and the sources and methods of selection of participants</p> <p>(b) <i>Cohort study</i> - For matched studies, give matching criteria and number of exposed and unexposed</p> <p><i>Case-control study</i> - For matched studies, give matching criteria and the number of controls per case</p> | Method: Study Population | <p>RECORD 6.1: The methods of study population selection (such as codes or algorithms used to identify subjects) should be listed in detail. If this is not possible, an explanation should be provided.</p> <p>RECORD 6.2: Any validation studies of the codes or algorithms used to select the population should be referenced. If validation was conducted for this study and not published elsewhere, detailed methods and results should be provided.</p> <p>RECORD 6.3: If the study involved linkage of databases, consider use of a flow diagram or other graphical display to demonstrate the data linkage process, including the number of individuals with linked data at each stage.</p> | Method: Study Population.<br>No Validation studies were conducted for the use of the read codes in this study nor did this study include the use of linked datasets |
| Variables                    | 7 | Clearly define all outcomes, exposures, predictors, potential confounders, and effect modifiers. Give diagnostic criteria, if applicable.                                                                                                                                                                                                                                                                                                                                                                                                                                                                                                                                                                                    | Method: Study Population | RECORD 7.1: A complete list of codes and algorithms used to classify exposures, outcomes, confounders, and effect modifiers should be provided. If these cannot be reported, an explanation should be provided.                                                                                                                                                                                                                                                                                                                                                                                                                                                                                      | Supplementary Materials 1                                                                                                                                           |
| Data sources/<br>measurement | 8 | For each variable of interest, give sources of data and details of methods of assessment (measurement).                                                                                                                                                                                                                                                                                                                                                                                                                                                                                                                                                                                                                      | Method Study Population  |                                                                                                                                                                                                                                                                                                                                                                                                                                                                                                                                                                                                                                                                                                      |                                                                                                                                                                     |

|                        |    |                                                                                                                                                                                                                                                                                                                                                                                                                                                                                                                                                                                                     |                                                                                  |  |  |
|------------------------|----|-----------------------------------------------------------------------------------------------------------------------------------------------------------------------------------------------------------------------------------------------------------------------------------------------------------------------------------------------------------------------------------------------------------------------------------------------------------------------------------------------------------------------------------------------------------------------------------------------------|----------------------------------------------------------------------------------|--|--|
|                        |    | Describe comparability of assessment methods if there is more than one group                                                                                                                                                                                                                                                                                                                                                                                                                                                                                                                        |                                                                                  |  |  |
| Bias                   | 9  | Describe any efforts to address potential sources of bias                                                                                                                                                                                                                                                                                                                                                                                                                                                                                                                                           | Methods: Study design and data source, study population and statistical analysis |  |  |
| Study size             | 10 | Explain how the study size was arrived at                                                                                                                                                                                                                                                                                                                                                                                                                                                                                                                                                           | Methods: Study Population                                                        |  |  |
| Quantitative variables | 11 | Explain how quantitative variables were handled in the analyses. If applicable, describe which groupings were chosen, and why                                                                                                                                                                                                                                                                                                                                                                                                                                                                       | Methods: Statistical analysis                                                    |  |  |
| Statistical methods    | 12 | <p>(a) Describe all statistical methods, including those used to control for confounding</p> <p>(b) Describe any methods used to examine subgroups and interactions</p> <p>(c) Explain how missing data were addressed</p> <p>(d) <i>Cohort study</i> - If applicable, explain how loss to follow-up was addressed</p> <p><i>Case-control study</i> - If applicable, explain how matching of cases and controls was addressed</p> <p><i>Cross-sectional study</i> - If applicable, describe analytical methods taking account of sampling strategy</p> <p>(e) Describe any sensitivity analyses</p> | Methods: Statistical analysis                                                    |  |  |

|                                  |    |                                                                                                                                                                                                                                                                                                                                     |                                               |                                                                                                                                                                                                                                                                                                                    |                                       |
|----------------------------------|----|-------------------------------------------------------------------------------------------------------------------------------------------------------------------------------------------------------------------------------------------------------------------------------------------------------------------------------------|-----------------------------------------------|--------------------------------------------------------------------------------------------------------------------------------------------------------------------------------------------------------------------------------------------------------------------------------------------------------------------|---------------------------------------|
| Data access and cleaning methods |    | ..                                                                                                                                                                                                                                                                                                                                  |                                               | <p>RECORD 12.1: Authors should describe the extent to which the investigators had access to the database population used to create the study population.</p> <p>RECORD 12.2: Authors should provide information on the data cleaning methods used in the study.</p>                                                | Methods: Study Design and data source |
| Linkage                          |    | ..                                                                                                                                                                                                                                                                                                                                  |                                               | RECORD 12.3: State whether the study included person-level, institutional-level, or other data linkage across two or more databases. The methods of linkage and methods of linkage quality evaluation should be provided.                                                                                          | Methods: Study Design and data source |
| <b>Results</b>                   |    |                                                                                                                                                                                                                                                                                                                                     |                                               |                                                                                                                                                                                                                                                                                                                    |                                       |
| Participants                     | 13 | <p>(a) Report the numbers of individuals at each stage of the study (<i>e.g.</i>, numbers potentially eligible, examined for eligibility, confirmed eligible, included in the study, completing follow-up, and analysed)</p> <p>(b) Give reasons for non-participation at each stage.</p> <p>(c) Consider use of a flow diagram</p> | Results: baseline characteristics and table 1 | RECORD 13.1: Describe in detail the selection of the persons included in the study ( <i>i.e.</i> , study population selection) including filtering based on data quality, data availability and linkage. The selection of included persons can be described in the text and/or by means of the study flow diagram. | Methods: Study Population             |
| Descriptive data                 | 14 | <p>(a) Give characteristics of study participants (<i>e.g.</i>, demographic, clinical, social) and information on exposures and potential confounders</p> <p>(b) Indicate the number of participants with missing data for each variable of interest</p>                                                                            | Results: baseline characteristics and table 1 |                                                                                                                                                                                                                                                                                                                    |                                       |

|                   |    |                                                                                                                                                                                                                                                                                                                                                                                                                 |                                                                         |                                                                                                      |                                    |
|-------------------|----|-----------------------------------------------------------------------------------------------------------------------------------------------------------------------------------------------------------------------------------------------------------------------------------------------------------------------------------------------------------------------------------------------------------------|-------------------------------------------------------------------------|------------------------------------------------------------------------------------------------------|------------------------------------|
|                   |    | (c) <i>Cohort study</i> - summarise follow-up time (e.g., average and total amount)                                                                                                                                                                                                                                                                                                                             |                                                                         |                                                                                                      |                                    |
| Outcome data      | 15 | <i>Cohort study</i> - Report numbers of outcome events or summary measures over time<br><i>Case-control study</i> - Report numbers in each exposure category, or summary measures of exposure<br><i>Cross-sectional study</i> - Report numbers of outcome events or summary measures                                                                                                                            | Results: Association between DA and Cardiometabolic disease and Table 2 |                                                                                                      |                                    |
| Main results      | 16 | (a) Give unadjusted estimates and, if applicable, confounder-adjusted estimates and their precision (e.g., 95% confidence interval). Make clear which confounders were adjusted for and why they were included<br>(b) Report category boundaries when continuous variables were categorized<br>(c) If relevant, consider translating estimates of relative risk into absolute risk for a meaningful time period | Results: Association between DA and Cardiometabolic disease and Table 2 |                                                                                                      |                                    |
| Other analyses    | 17 | Report other analyses done— e.g., analyses of subgroups and interactions, and sensitivity analyses                                                                                                                                                                                                                                                                                                              | Nil other sensitivity analyses                                          |                                                                                                      |                                    |
| <b>Discussion</b> |    |                                                                                                                                                                                                                                                                                                                                                                                                                 |                                                                         |                                                                                                      |                                    |
| Key results       | 18 | Summarise key results with reference to study objectives                                                                                                                                                                                                                                                                                                                                                        | Discussion: Summary of key results                                      |                                                                                                      |                                    |
| Limitations       | 19 | Discuss limitations of the study, taking into account sources of potential bias or imprecision.                                                                                                                                                                                                                                                                                                                 | Discussion: Study limitations                                           | RECORD 19.1: Discuss the implications of using data that were not created or collected to answer the | Discussion: Summary of key results |

|                                                           |    |                                                                                                                                                                            |                 |                                                                                                                                                                                                     |                                                              |
|-----------------------------------------------------------|----|----------------------------------------------------------------------------------------------------------------------------------------------------------------------------|-----------------|-----------------------------------------------------------------------------------------------------------------------------------------------------------------------------------------------------|--------------------------------------------------------------|
|                                                           |    | Discuss both direction and magnitude of any potential bias                                                                                                                 |                 | specific research question(s). Include discussion of misclassification bias, unmeasured confounding, missing data, and changing eligibility over time, as they pertain to the study being reported. |                                                              |
| Interpretation                                            | 20 | Give a cautious overall interpretation of results considering objectives, limitations, multiplicity of analyses, results from similar studies, and other relevant evidence | Conclusion      |                                                                                                                                                                                                     |                                                              |
| Generalisability                                          | 21 | Discuss the generalisability (external validity) of the study results                                                                                                      | Conclusion      |                                                                                                                                                                                                     |                                                              |
| <b>Other Information</b>                                  |    |                                                                                                                                                                            |                 |                                                                                                                                                                                                     |                                                              |
| Funding                                                   | 22 | Give the source of funding and the role of the funders for the present study and, if applicable, for the original study on which the present article is based              | Funding section |                                                                                                                                                                                                     |                                                              |
| Accessibility of protocol, raw data, and programming code |    | ..                                                                                                                                                                         |                 | RECORD 22.1: Authors should provide information on how to access any supplemental information such as the study protocol, raw data, or programming code.                                            | Data sharing and accessibility statement and supplementary 2 |

\*Reference: Benchimol EI, Smeeth L, Guttman A, Harron K, Moher D, Petersen I, Sørensen HT, von Elm E, Langan SM, the RECORD Working Committee. The REporting of studies Conducted using Observational Routinely-collected health Data (RECORD) Statement. *PLoS Medicine* 2015; in press.

\*Checklist is protected under Creative Commons Attribution ([CC BY](https://creativecommons.org/licenses/by/4.0/)) license.
